# Supplementary material
Source: MDPI journal article supplement (https://www.mdpi.com/2072-4292/15/7/1736)
Supplement: s1 [file s1]

## Supplementary Material

### CONTENTS:

**Table S1.** The RegCM4 Model configuration used in this study.

**Table S2.** Transfer matrix of soil erosion rate before and after irrigation under RCP8.5 scenario (%)

**Table S3.** Soil erosion area percentage (%) in different altitude zones

**Table S4.** Statistical parameters of soil erosion change in typical years

**Figure S1**  $R$  factor (unit:  $\text{MJ}\cdot\text{mm}\cdot\text{ha}^{-2}\cdot\text{h}^{-1}\cdot\text{yr}^{-1}$ ) of the RUSLE model under Y4.5 (a) and Y8.5 (b).

**Figure S2** Spatial pattern of soil erosion rates in the YRB with and without irrigation. [(a) and (b) depict the soil erosion rate in YRB under Y45 and Y85 experiments, respectively; (c) and (d) show the corresponding change rate (defined as  $Y-N$ ), unit:  $\text{t}\cdot\text{ha}^{-1}\cdot\text{yr}^{-1}$ ) of soil erosion rate with irrigation (Y45, Y85) compared to without irrigation (N45, N85)].

**Figure S3** Spatial distribution of differences (defined as  $(Y-N)\times 100/N$ ; unit: %) in summer precipitation indices under RCP8.5 over the YRB. [(a) PRCPTOT; (b) CWD; (c) CDD; (d) SDII; (e) R01mm; (f) R12mm]

**Figure S4** Differences (defined as  $Y$  minus  $N$ ) in the integrated water vapor flux (shading, unit:  $\text{kg}\cdot\text{m}^{-1}\cdot\text{s}^{-1}$ ) and wind field (vector, unit:  $\text{m}\cdot\text{s}^{-1}$ ) at 850hPa under RCP4.5 from June to August. [(a) June; (b) July; (c) August]

**Figure S5** Differences (defined as RCP8.5 minus RCP4.5) in the integrated water vapor flux (shading, unit:  $\text{kg}\cdot\text{m}^{-1}\cdot\text{s}^{-1}$ ) and wind field (vector, unit:  $\text{m}\cdot\text{s}^{-1}$ ) at 850hPa from June to August. [(a) June; (b) July; (c) August]

**Figure S6** Spatial distribution of soil erosion rate changes (defined as  $Y$  minus  $N$ ; unit:  $\text{t}\cdot\text{ha}^{-1}\cdot\text{yr}^{-1}$ ) in typical years. [(a)~(c) represent wet, dry, normal years under the RCP4.5 scenario, respectively; (d)~(f) are similar to (a)~(c), but under the RCP8.5 scenario.]

**Table S1** The RegCM4 Model configuration used in this study.

| Contents                         | Description                                                                                  |
|----------------------------------|----------------------------------------------------------------------------------------------|
| Domain                           | 50 km horizontal resolution<br>Central Lat. and Lon.: 35 °N, 115 °E<br>200 (Lon) × 130 (Lat) |
| Vertical layers (top)            | 18 vertical sigma levels (1 hPa)                                                             |
| PBL scheme                       | Holtslag                                                                                     |
| Cumulus parameterization scheme  | Emanuel                                                                                      |
| Land surface model               | NCAR CLM3.5                                                                                  |
| Short-/Longwave radiation scheme | NCAR CCM3                                                                                    |
| Boundary data                    | MPI-ESM-MR                                                                                   |
| Simulation period                | Jan. 1970–Dec. 2000 ; Jan. 2020–Dec. 2050                                                    |
| Analysis period                  | Jan. 1971–Dec. 2000 ; Jan. 2021–Dec. 2050                                                    |

**Table S2.** Transfer matrix of soil erosion rate before and after irrigation under RCP8.5 scenario (%)

|     |                  | Y85         |        |       |          |        |             | Total  |
|-----|------------------|-------------|--------|-------|----------|--------|-------------|--------|
|     |                  | Very slight | Slight | Light | Moderate | Severe | Very severe |        |
| N85 | Very slight      | 50.14       | 0.75   |       |          |        |             | 50.90  |
|     | Slight           | 0.73        | 9.78   | 0.78  |          |        |             | 11.29  |
|     | Light            |             | 0.68   | 12.65 | 0.70     |        |             | 14.04  |
|     | Moderate         |             |        | 0.44  | 7.35     | 0.57   |             | 8.36   |
|     | Severe           |             |        |       | 0.29     | 4.05   | 0.48        | 4.82   |
|     | Very severe      |             |        |       |          | 0.22   | 4.75        | 5.30   |
|     | Extremely severe |             |        |       |          |        | 0.16        | 5.30   |
|     | Total            | 50.88       | 11.21  | 13.87 | 8.35     | 4.83   | 5.39        | 100.00 |

**Table S3.** Soil erosion area percentage (%) in different altitude zones

| Altitude (m) |           | Very slight  | Slight       | Light        | Moderate     | Severe       | Very severe  | Extremely severe | Total |
|--------------|-----------|--------------|--------------|--------------|--------------|--------------|--------------|------------------|-------|
| RCP4.5       | 0-500     | 5.69(-0.02)  | 0.33 (0.61)  | 0.33 (-1.75) | 0.16 (-2.48) | 0.08 (0.98)  | 0.07 (6.63)  | 0.07 (4.50)      | 6.73  |
|              | 500-1000  | 3.89(-2.22)  | 0.99 (-0.05) | 1.35 (0.75)  | 0.93 (1.17)  | 0.58 (1.60)  | 0.65 (1.58)  | 0.71 (6.51)      | 9.1   |
|              | 1000-2000 | 26.26(-0.12) | 5.80 (0.19)  | 6.95 (1.24)  | 4.50 (1.02)  | 2.84 (0.22)  | 3.31 (0.07)  | 3.54 (-3.42)     | 53.21 |
|              | 2000-3000 | 2.62(0.18)   | 1.07 (2.21)  | 1.70 (0.52)  | 1.18 (0.77)  | 0.65 (0.12)  | 0.68 (-1.71) | 0.66 (-5.43)     | 8.56  |
|              | 3000-4000 | 6.83(-2.17)  | 1.81 (0.24)  | 2.11 (2.16)  | 0.82 (6.52)  | 0.29 (8.94)  | 0.23 (4.67)  | 0.14 (5.98)      | 12.23 |
|              | >4000     | 5.75(0.28)   | 1.19 (0.84)  | 1.51 (0.57)  | 0.75 (0.69)  | 0.35 (1.86)  | 0.36 (-1.61) | 0.25 (0.76)      | 10.17 |
| RCP8.5       | 0-500     | 5.66(0.62)   | 0.34 (-1.55) | 0.33 (-2.36) | 0.16 (-1.45) | 0.08 (-5.92) | 0.08(-10.48) | 0.08 (-8.85)     | 6.73  |
|              | 500-1000  | 3.75(4.03)   | 0.99 (-0.40) | 1.36 (-2.39) | 0.95 (-4.22) | 0.60 (-2.83) | 0.67 (-1.72) | 0.78 (-5.85)     | 9.1   |
|              | 1000-2000 | 26.09(0.90)  | 5.81 (-1.22) | 7.05 (-3.00) | 4.57 (-2.28) | 2.87 (-0.52) | 3.34 (1.50)  | 3.49 (3.38)      | 53.21 |
|              | 2000-3000 | 2.71(-4.56)  | 1.11 (-1.49) | 1.73 (-1.51) | 1.16 (3.68)  | 0.64 (2.59)  | 0.64 (6.42)  | 0.59 (11.21)     | 8.56  |
|              | 3000-4000 | 6.92(-3.31)  | 1.84 (0.20)  | 2.08 (4.06)  | 0.77 (9.35)  | 0.28 (10.73) | 0.21 (10.39) | 0.14 (12.17)     | 12.23 |
|              | >4000     | 5.77(-1.52)  | 1.20 (1.43)  | 1.50 (1.63)  | 0.75 (2.60)  | 0.36 (0.93)  | 0.36 (-0.39) | 0.23 (10.51)     | 10.17 |

Notes: The parentheses represent the change percentage (%) in the soil erosion area in different altitude zones under the irrigation scenario.

**Table S4.** Statistical parameters of soil erosion change in typical years

| Typical year       | RCP4.5             |       | RCP8.5             |       |
|--------------------|--------------------|-------|--------------------|-------|
|                    | Standard Deviation | Mean  | Standard Deviation | Mean  |
| Normal             | 26.7               | -1.3  | 28.5               | 2.5   |
| Dry                | 14.3               | -3.9  | 23.1               | -4.2  |
| Wet                | 38.2               | -11.4 | 40.7               | -14.2 |
| Multi-year average | 10.2               | -3.2  | 12.6               | -4.2  |

(a)  $R$  factor in RUSLE model under Y45

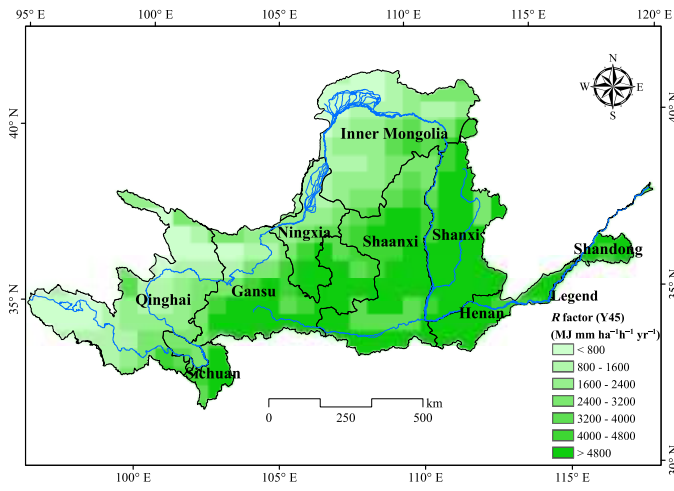

(b)  $R$  factor in RUSLE model under Y85

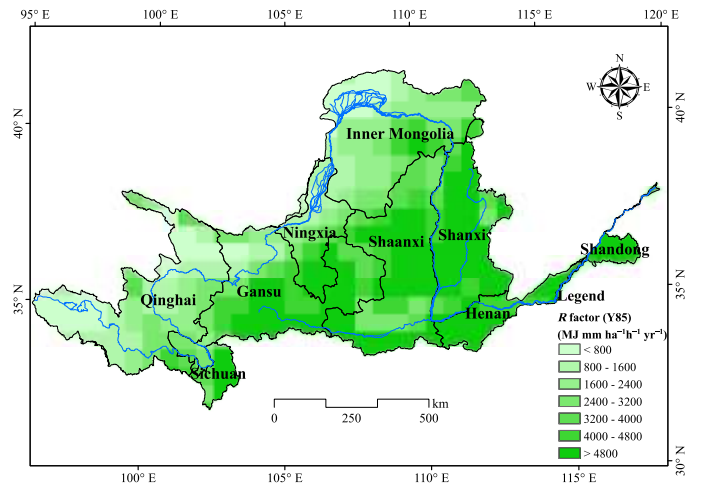

**Figure S1**  $R$  factor (unit:  $\text{MJ} \cdot \text{mm} \cdot \text{ha}^{-2} \cdot \text{h}^{-1} \cdot \text{yr}^{-1}$ ) of the RUSLE model under Y4.5 (a) and Y8.5 (b).

(a) soil erosion rate under Y45

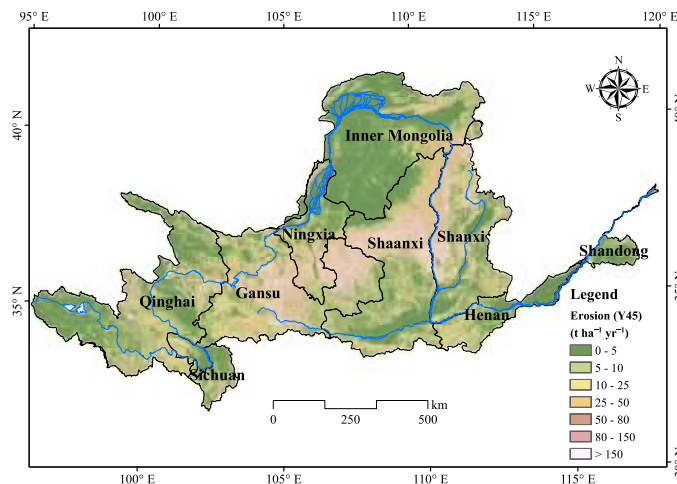

(b) soil erosion rate under Y85

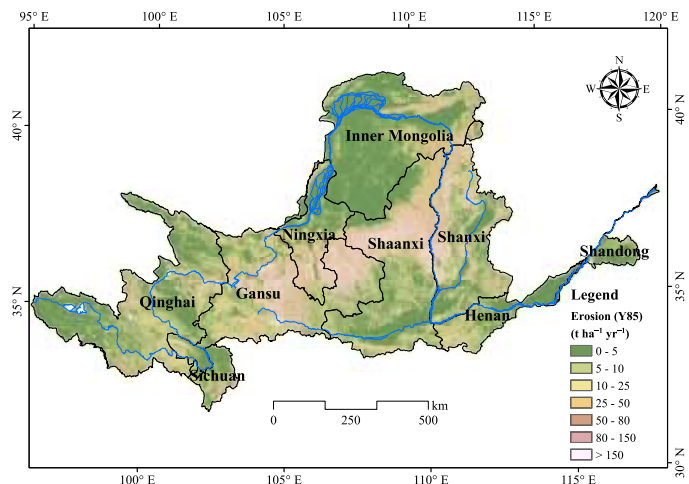

(c) Changes of soil erosion rate under RCP4.5

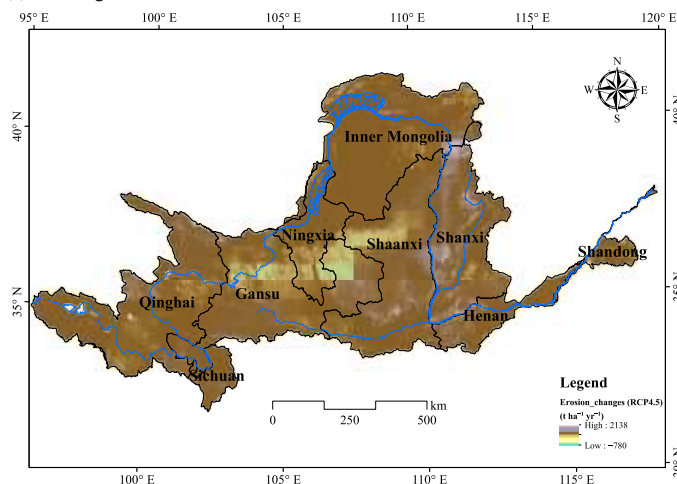

(d) Changes of soil erosion rate under RCP8.5

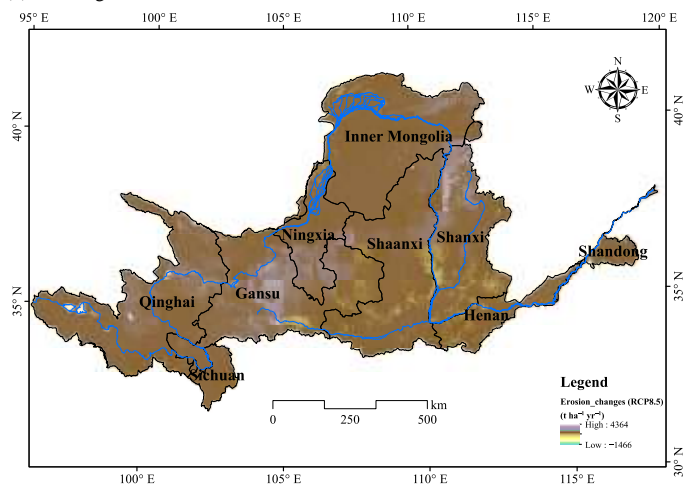

**Figure S2** Spatial pattern of soil erosion rates in the YRB with and without irrigation. [(a) and (b) depict the soil erosion rate in YRB under Y45 and Y85 experiments, respectively; (c) and (d) show the corresponding change rate (defined as  $Y-N$ ), unit:  $t \cdot ha^{-1} \cdot yr^{-1}$  of soil erosion rate with irrigation (Y45, Y85) compared to without irrigation (N45, N85)].

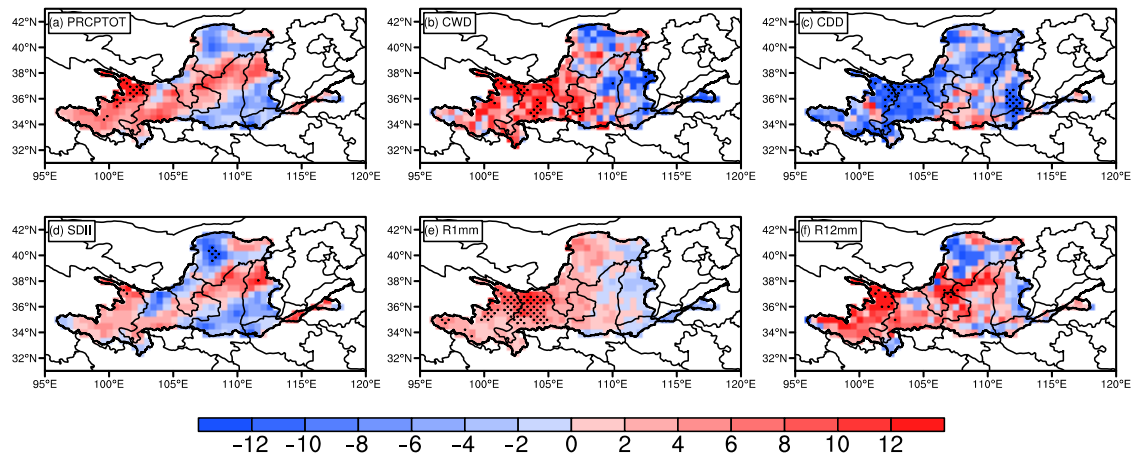

**Figure S3** Spatial distribution of differences (defined as  $(Y-N) \times 100/N$ ; unit: %) in summer precipitation indices under RCP8.5 over the YRB. [(a) PRCPTOT; (b) CWD; (c) CDD; (d) SDII; (e) R01mm; (f) R12mm]



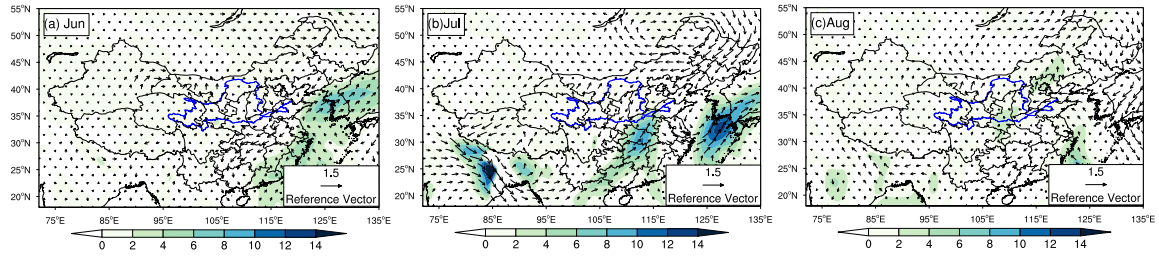

**Figure S4** Differences (defined as Y minus N) in the integrated water vapor flux (shading, unit:  $\text{kg}\cdot\text{m}^{-1}\cdot\text{s}^{-1}$ ) and wind field (vector, unit:  $\text{m}\cdot\text{s}^{-1}$ ) at 850hPa under RCP4.5 from June to August. [(a) June; (b) July; (c) August]

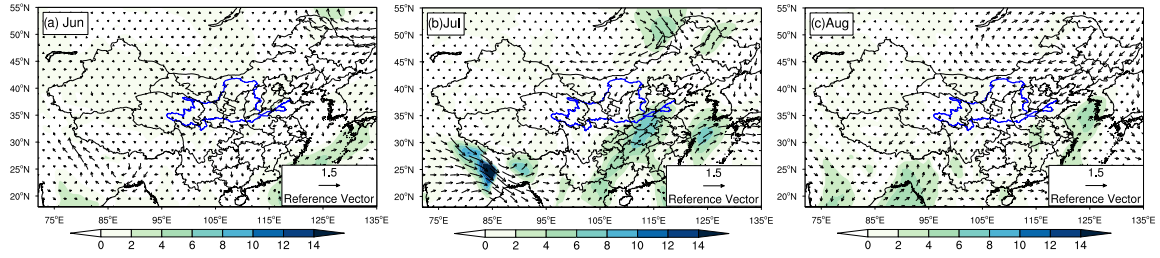

**Figure S5** Differences (defined as RCP8.5 minus RCP4.5) in the integrated water vapor flux (shading, unit:  $\text{kg}\cdot\text{m}^{-1}\cdot\text{s}^{-1}$ ) and wind field (vector, unit:  $\text{m}\cdot\text{s}^{-1}$ ) at 850hPa from June to August. [(a) June; (b) July; (c) August]

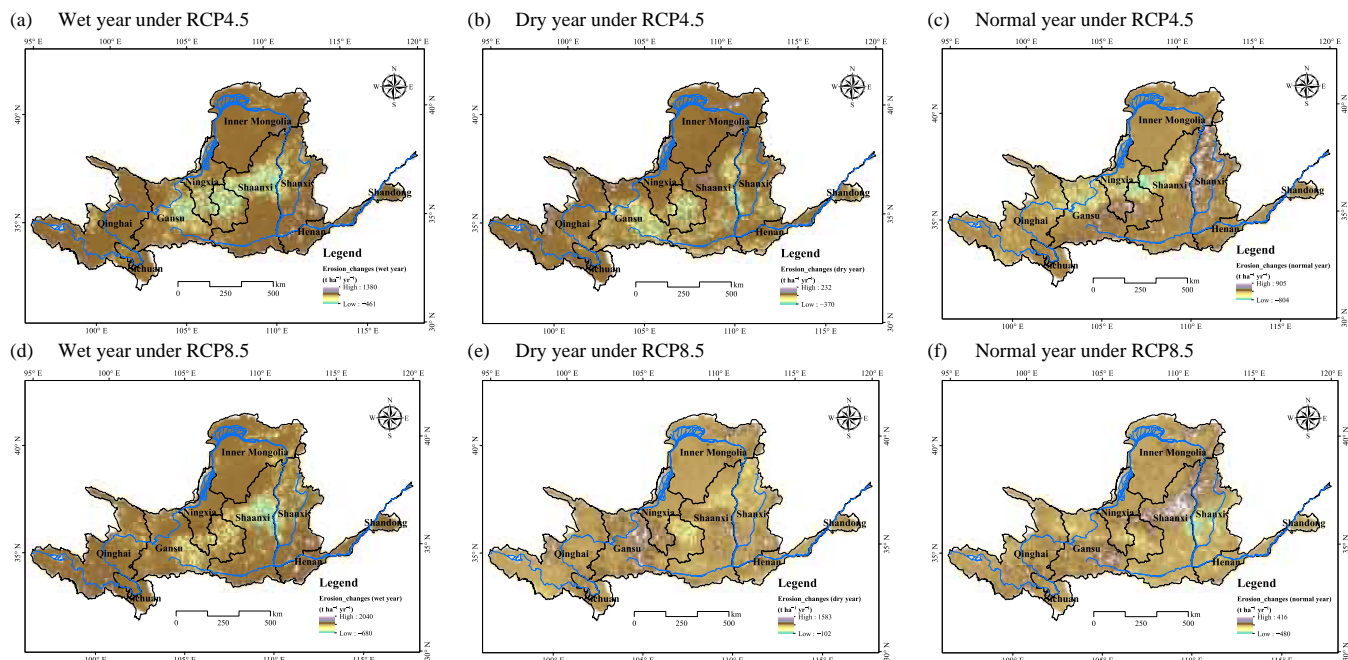

**Figure S6** Spatial distribution of soil erosion rate changes (defined as Y minus N; unit:  $\text{t} \cdot \text{ha}^{-1} \cdot \text{yr}^{-1}$ ) in typical years. [(a)~(c) represent wet, dry, normal years under the RCP4.5 scenario, respectively; (d)~(f) are similar to (a)~(c), but under the RCP8.5 scenario.]
